# Supplementary material for: Short reads from honey bee (Apis sp.) sequencing projects reflect microbial associate diversity
Source: PubMed Central journal article supplement (PMC5510586; doi:10.7717/peerj.3529), 2017-07-12

0.1

Source of isolates

- Apidae
- other Hymenoptera
- ▲ Apis SRA
- from Engel et al. 2012

Lactobacillus groups

- delbrueckii
- reuteri
- salivarius
- buchneri
- casei
- sakei
- plantarum
- alimentarius-farciminis
- coryniformis
- brevis
- fructivorans
- perolens
- outgroup

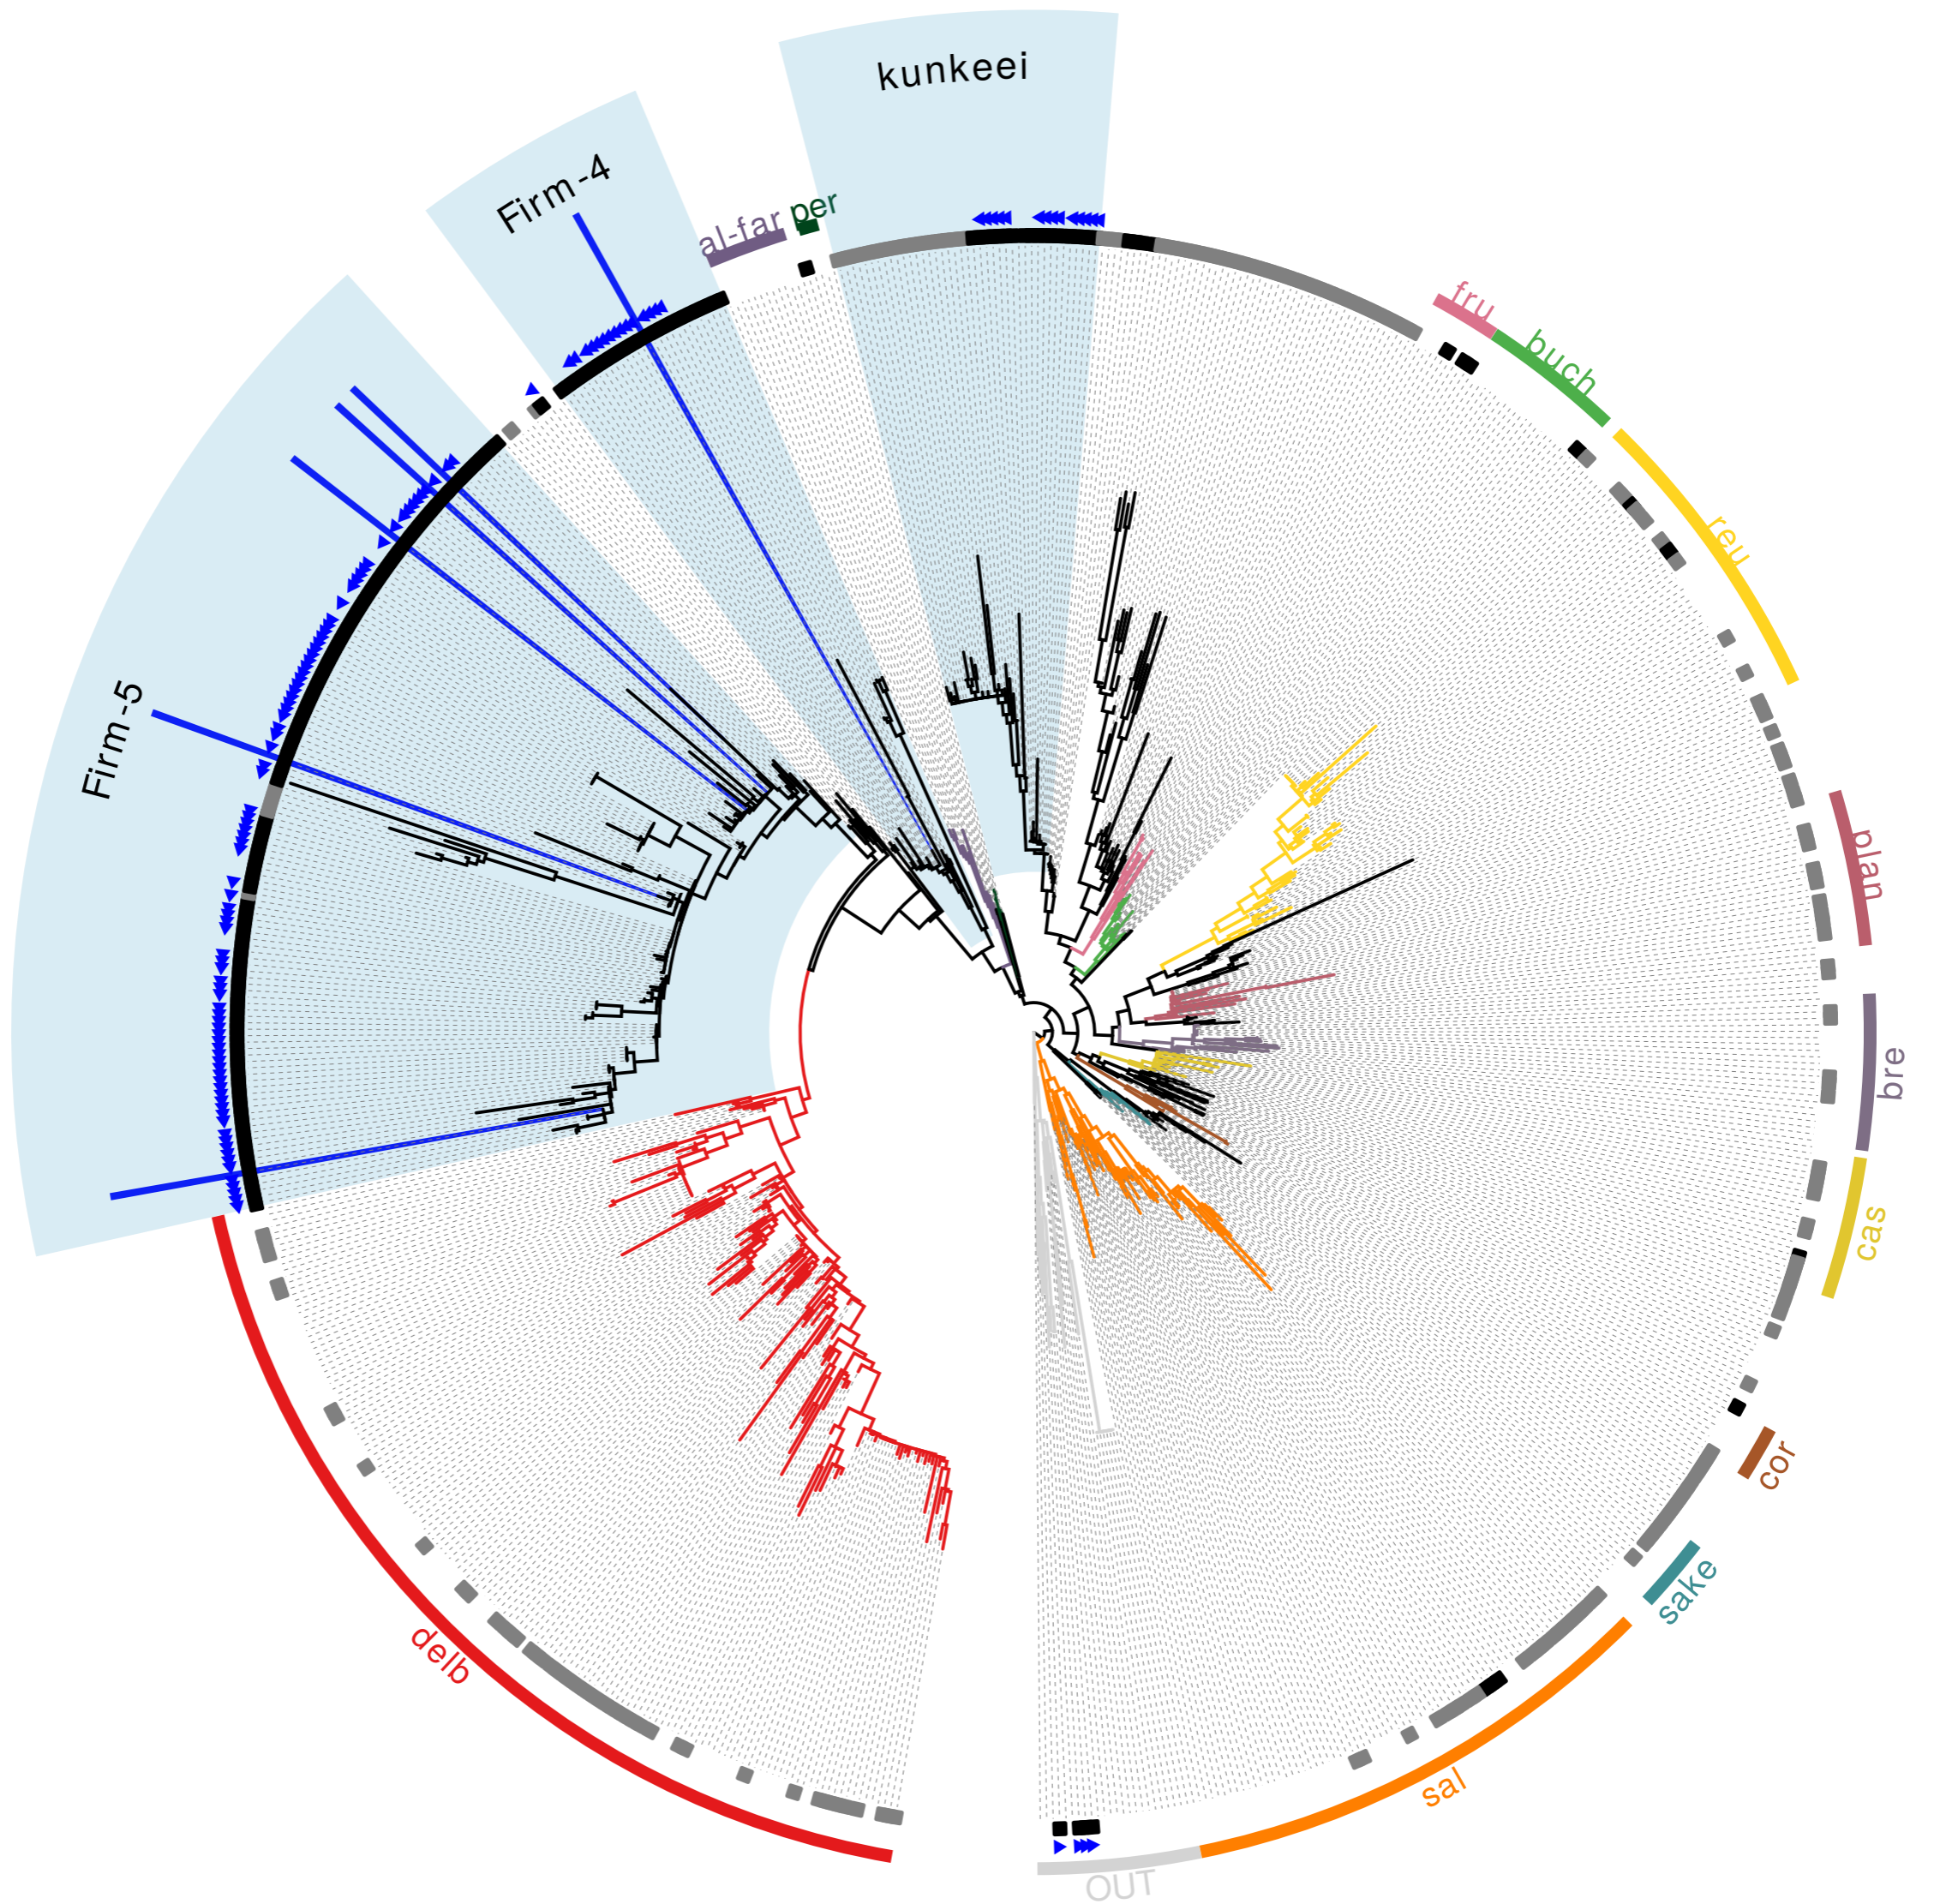

Supplement: peerj-05-3529-s001.pdf [file peerj-05-3529-s001.pdf]
